# Supplementary material
Source: publisher figshare collection journal article supplement (https://karger.figshare.com/articles/dataset/_/5146906)
Supplement: Supplementary file 1 [file 1]

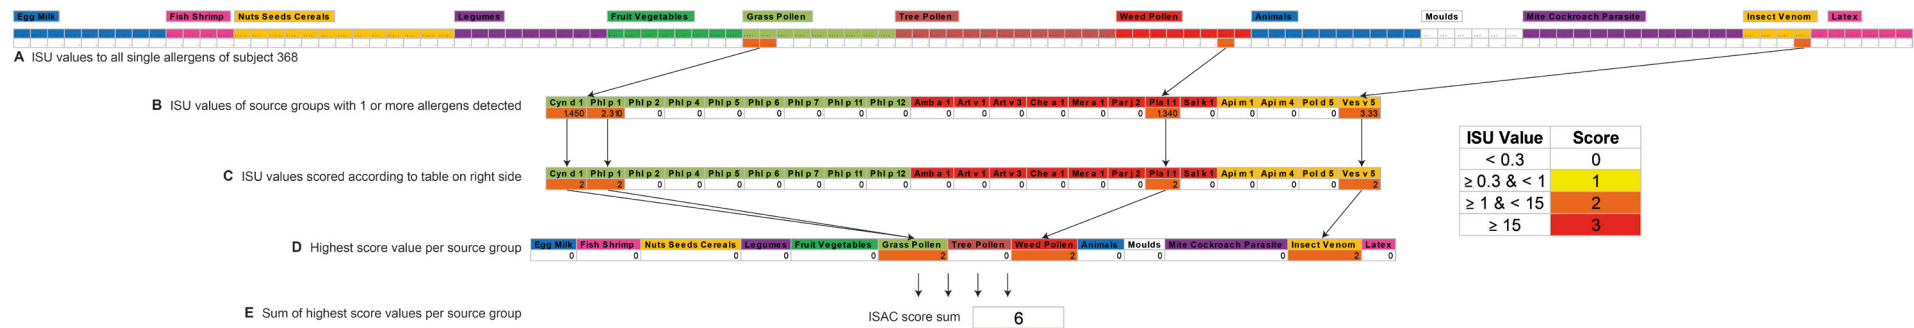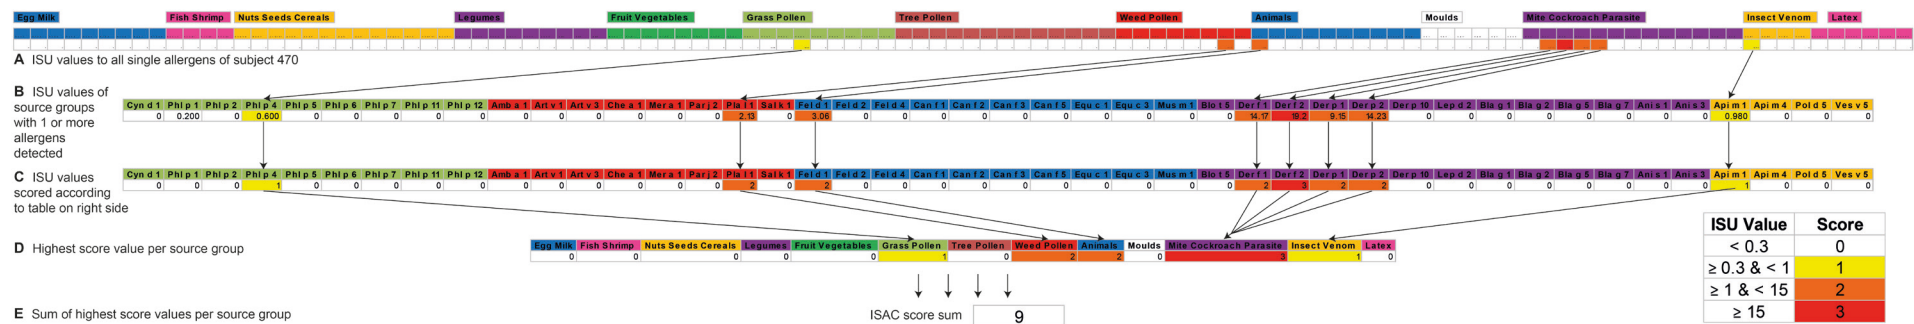

**Figure E1.** Examples of ISAC score sum generation shown for two individual participants. **A**, ISU values to 112 single allergens for one individual subject. **B**, ISU values of source groups with 1 or more allergens detected with  $\text{ISU} \geq 0.3$ . **C**, ISU values are scored according to table on right side. **D**, Highest score value per source group is chosen. **E**, Sum of highest score values per source group is generated. Upper panel shows participant no. 368, lower panel shows participant no. 470.
