# Supplementary material
Source: publisher figshare collection journal article supplement (https://karger.figshare.com/articles/dataset/_/5146906)
Supplement: Supplementary file 2 [file 1]

| Egg Milk                                                                                                                                                          | Fish Shrimp                                                                 | Nuts Seeds Cereals                                                                                                                                                                                                                                                                                                          | Legumes                                                                                                                                | Fruit Vegetables                                                                                                                                                 | Grass pollen                                                                                                                                          | Tree pollen                                                                                                                                                                                                                                                                                     | Weed pollen                                                                                                                                                                                                                                                          | Animals                                                                                                                                                                            | Moulds                                                                                                                                   | Mite Cockroach Parasite                                                                                                                                                                                                                                                                                    | Insect venom                                                                                                    | Latex                                                                  |
|-------------------------------------------------------------------------------------------------------------------------------------------------------------------|-----------------------------------------------------------------------------|-----------------------------------------------------------------------------------------------------------------------------------------------------------------------------------------------------------------------------------------------------------------------------------------------------------------------------|----------------------------------------------------------------------------------------------------------------------------------------|------------------------------------------------------------------------------------------------------------------------------------------------------------------|-------------------------------------------------------------------------------------------------------------------------------------------------------|-------------------------------------------------------------------------------------------------------------------------------------------------------------------------------------------------------------------------------------------------------------------------------------------------|----------------------------------------------------------------------------------------------------------------------------------------------------------------------------------------------------------------------------------------------------------------------|------------------------------------------------------------------------------------------------------------------------------------------------------------------------------------|------------------------------------------------------------------------------------------------------------------------------------------|------------------------------------------------------------------------------------------------------------------------------------------------------------------------------------------------------------------------------------------------------------------------------------------------------------|-----------------------------------------------------------------------------------------------------------------|------------------------------------------------------------------------|
| <b>Egg white / Egg yolk</b><br>Gal d 1<br>Gal d 2<br>Gal d 3<br>Gal d 5<br><br><b>Cow's milk</b><br>Bos d 4<br>Bos d 5<br>Bos d 6<br>Bos d 8<br>Bos d lactoferrin | <b>Cod</b><br>Gad c 1<br><br><b>Shrimp</b><br>Pen m 1<br>Pen m 2<br>Pen m 4 | <b>Cashew nut</b><br>Ana o 2<br><br><b>Brazil nut</b><br>Ber e 1<br><br><b>Hazelnut</b><br>Cor a 1.0401<br>Cor a 8<br>Cor a 9<br><br><b>Walnut</b><br>Jug r 1<br>Jug r 2<br>Jug r 3<br><br><b>Sesame seed</b><br>Ses i 1<br><br><b>Buckwheat</b><br>Fag e 2<br><br><b>Wheat</b><br>Tri a 14<br>Tri a 19.0101<br>Tri a aA_TI | <b>Peanut</b><br>Ara h 1<br>Ara h 2<br>Ara h 3<br>Ara h 6<br>Ara h 8<br>Ara h 9<br><br><b>Soybean</b><br>Gly m 4<br>Gly m 5<br>Gly m 6 | <b>Apple</b><br>Mal d 1<br><br><b>Kiwi</b><br>Act d 1<br>Act d 2<br>Act d 5<br>Act d 8<br><br><b>Peach</b><br>Pru p 1<br>Pru p 3<br><br><b>Celery</b><br>Api g 1 | <b>Bermuda grass</b><br>Cyn d 1<br><br><b>Timothy grass</b><br>Phl p 1<br>Phl p 2<br>Phl p 4<br>Phl p 5<br>Phl p 6<br>Phl p 7<br>Phl p 11<br>Phl p 12 | <b>Alder</b><br>Aln g 1<br><br><b>Birch</b><br>Bet v 1<br>Bet v 2<br>Bet v 4<br><br><b>Cedar</b><br>Cry j 1<br><br><b>Cypress</b><br>Cup a 1<br><br><b>Hazel</b><br>Cor a 1.0101<br><br><b>Olive</b><br>Ole e 1<br>Ole e 7<br>Ole e 9<br><br><b>Plane tree</b><br>Pla a 1<br>Pla a 2<br>Pla a 3 | <b>Ragweed</b><br>Amb a 1<br><br><b>Mugwort</b><br>Art v 1<br>Art v 3<br><br><b>Goosefoot</b><br>Che a 1<br><br><b>Mercury</b><br>Mer a 1<br><br><b>Wall pellitory</b><br>Par j 2<br><br><b>English plantain</b><br>Pla l 1<br><br><b>Russian thistle</b><br>Sal k 1 | <b>Cat</b><br>Fel d 1<br>Fel d 2<br>Fel d 4<br><br><b>Dog</b><br>Can f 1<br>Can f 2<br>Can f 3<br>Can f 5<br><br><b>Horse</b><br>Equ c 1<br>Equ c 3<br><br><b>Mouse</b><br>Mus m 1 | <b>Alternaria</b><br>Alt a 1<br>Alt a 6<br><br><b>Aspergillus</b><br>Asp f 1<br>Asp f 3<br>Asp f 6<br><br><b>Cladosporium</b><br>Cla h 8 | <b>Blomia tropicalis</b><br>Blo t 5<br><br><b>D. farinae</b><br>Der f 1<br>Der f 2<br><br><b>D. pternoyssinus</b><br>Der p 1<br>Der p 2<br>Der p 10<br><br><b>Storage mite</b><br>Lep d 2<br><br><b>Cockroach</b><br>Bla g 1<br>Bla g 2<br>Bla g 5<br>Bla g 7<br><br><b>Anisakis</b><br>Ani s 1<br>Ani s 3 | <b>Honey bee</b><br>Api m 1<br>Api m 4<br><br><b>Paper wasp</b><br>Pol d 1<br><br><b>Common wasp</b><br>Ves v 5 | <b>Latex</b><br>Hev b 1<br>Hev b 3<br>Hev b 5<br>Hev b 6.01<br>Hev b 8 |

**Table E1.** Allergenic molecules available on ImmunoCAP ISAC® grouped into 13 allergen source families.
